# Supplementary material
Source: PubMed Central journal article supplement (PMC9977772)
Supplement: 41422_2022_773_MOESM2_ESM.pdf [file 41422_2022_773_MOESM2_ESM.pdf]

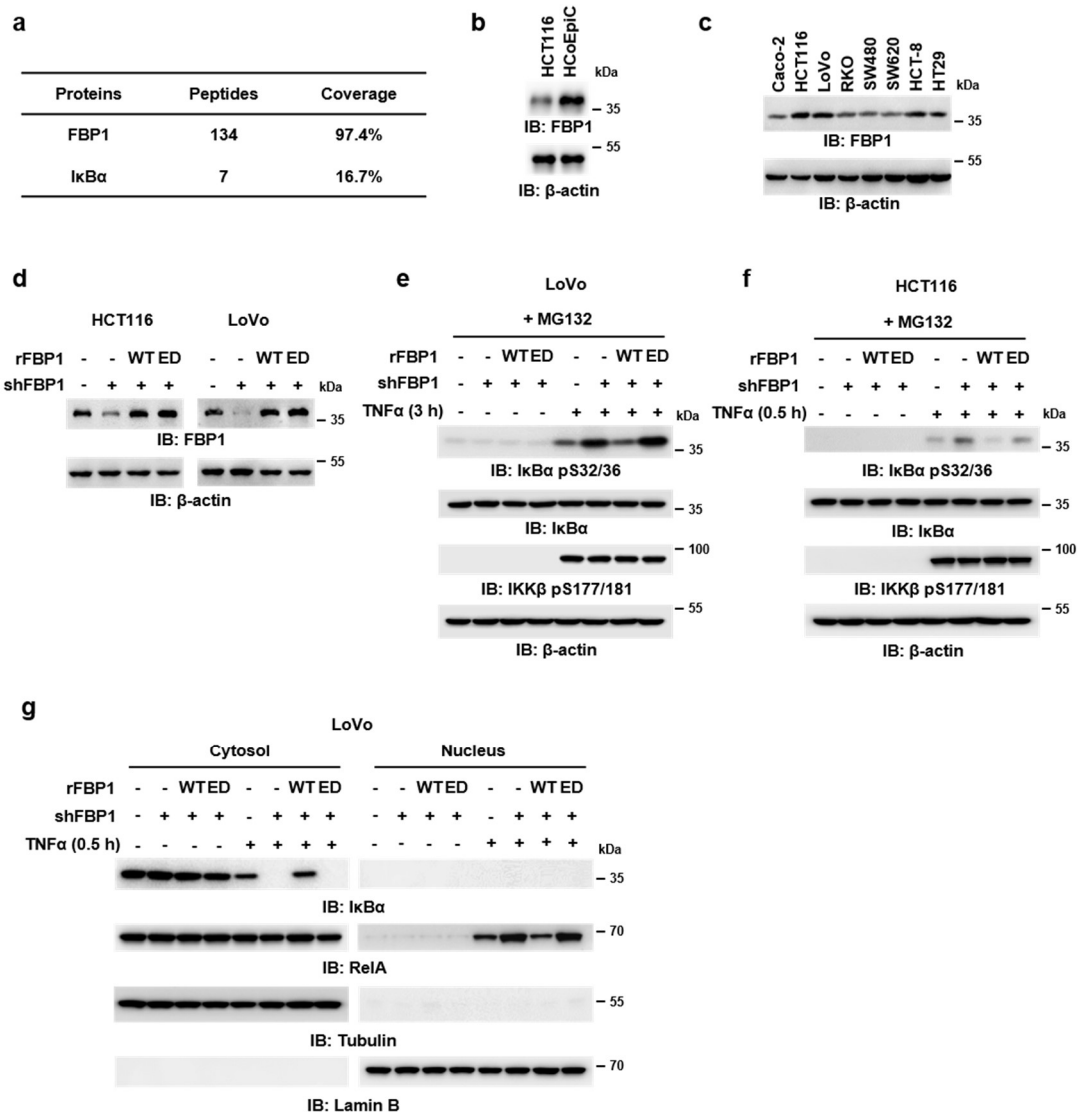

**Supplementary information, Fig. S2 FBP1 interacts with IκBα and inhibits TNFα-induced NF-κB signaling. Related to Fig. 2.**

**a** Mass spectrometry analyses of FBP1-associated proteins in HCT116 cells pretreated with 50 μM MG132 for 1 h and treated with or without TNFα (10 ng/ml) for 3 h. IκBα was identified to be interacted with FBP1.

**b** HCT116 and HCoEpiC cells were harvested and immunoblotting analyses were performed.

**c** Caco-2, HCT116, LoVo, RKO, SW480, SW620, HCT-8 and HT29 cells were harvested and immunoblotting analyses were performed.

**d** FBP1-depleted HCT116 or LoVo cells were rescued with rFBP1 WT or ED. Immunoblotting analyses were performed. ED, enzymatic dead.

**e** FBP1-depleted LoVo cells were rescued with rFBP1 WT or ED. Cells were pretreated with

50  $\mu$ M MG132 for 1 h and treated with or without TNF $\alpha$  (10 ng/ml) for 3 h. Immunoblotting assay was performed. NT, no treatment.

**f** FBP1-depleted HCT116 cells were rescued with rFBP1 WT or ED. Cells were pretreated with 50  $\mu$ M MG132 for 1 h and treated with or without TNF $\alpha$  (10 ng/ml) for 0.5 h. Immunoblotting assay was performed.

**g** FBP1-depleted LoVo cells were rescued with rFBP1 WT or ED. Cells were treated with or without TNF $\alpha$  (10 ng/ml) for 0.5 h. Cells were harvested and cell fraction assay was performed.
