# Supplementary material
Source: PubMed Central journal article supplement (PMC9977772)
Supplement: 41422_2022_773_MOESM3_ESM.pdf [file 41422_2022_773_MOESM3_ESM.pdf]

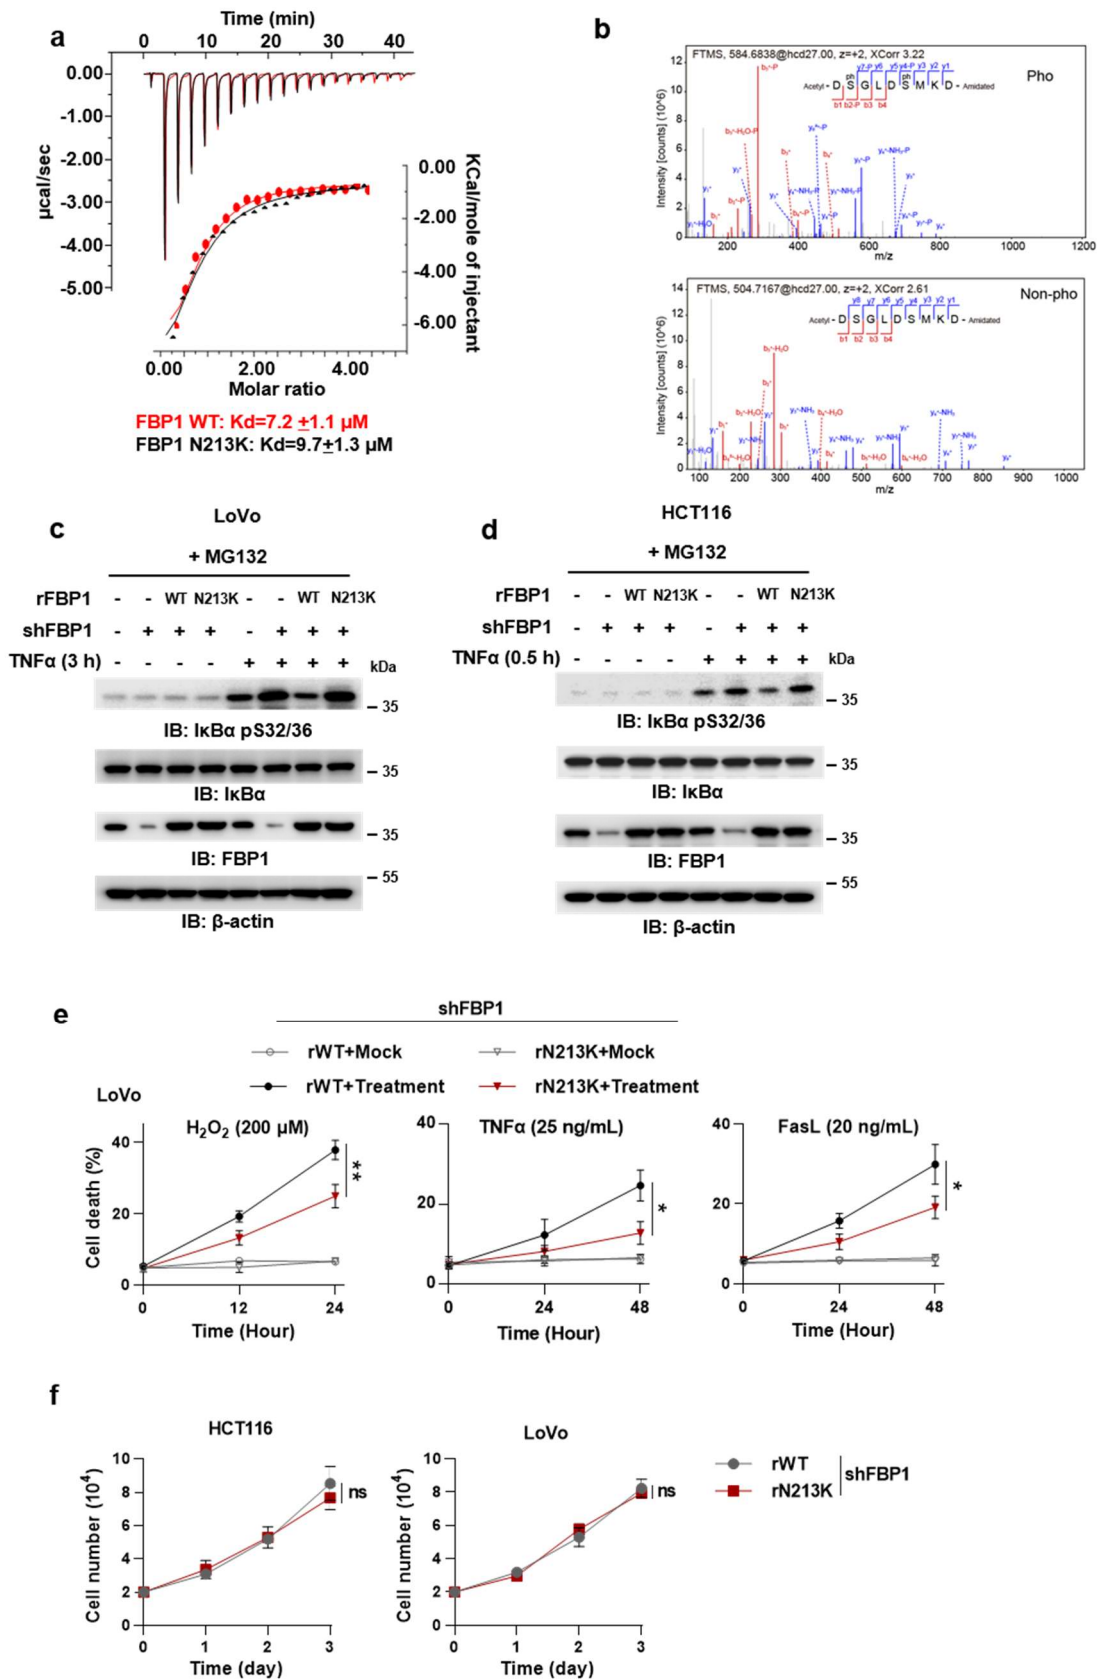

Supplementary information, Fig. S3 FBP1 N213K mutation disrupts FBP1/I $\kappa$ B $\alpha$  interaction and activates NF- $\kappa$ B to restrain inflammation-induced cell death. Related to

**Fig. 3.**

**a** Isothermal titration calorimetry (ITC) assays were performed with purified recombinant His-FBP1 WT or N213K and F-1,6-BP. K<sub>d</sub>, dissociation constant.

**b** Mass spectrometry analyses of phospho- and non-phospho-I $\kappa$ B $\alpha$  peptides.

**c** FBP1-depleted LoVo cells were rescued with rFBP1 WT or N213K. Cells were pretreated with 50  $\mu$ M MG132 for 1 h and treated with or without TNF $\alpha$  (10 ng/ml) for 3 h.

**d** FBP1-depleted HCT116 cells were rescued with rFBP1 WT or N213K. Cells were pretreated with 50  $\mu$ M MG132 for 1 h and treated with or without TNF $\alpha$  (10 ng/ml) for 0.5 h.

**e** FBP1-depleted LoVo cells were rescued with rFBP1 WT or N213K. Cells were pretreated with 5 ng/ml TNF $\alpha$  before treated with 200  $\mu$ M H<sub>2</sub>O<sub>2</sub>, 25 ng/ml TNF $\alpha$  or 20 ng/ml FasL. Cell viability were determined by trypan blue staining.

**f** FBP1-depleted HCT116 or LoVo cells were rescued with rFBP1 WT or N213K. Cell proliferation was measured by an SRB assay.

**e, f** Data represent the mean  $\pm$ s.d. of the indicated values from three biologically independent experiments (two-tailed Student's t-test).
