# Supplementary material
Source: PubMed Central journal article supplement (PMC9977772)
Supplement: 41422_2022_773_MOESM4_ESM.pdf [file 41422_2022_773_MOESM4_ESM.pdf]

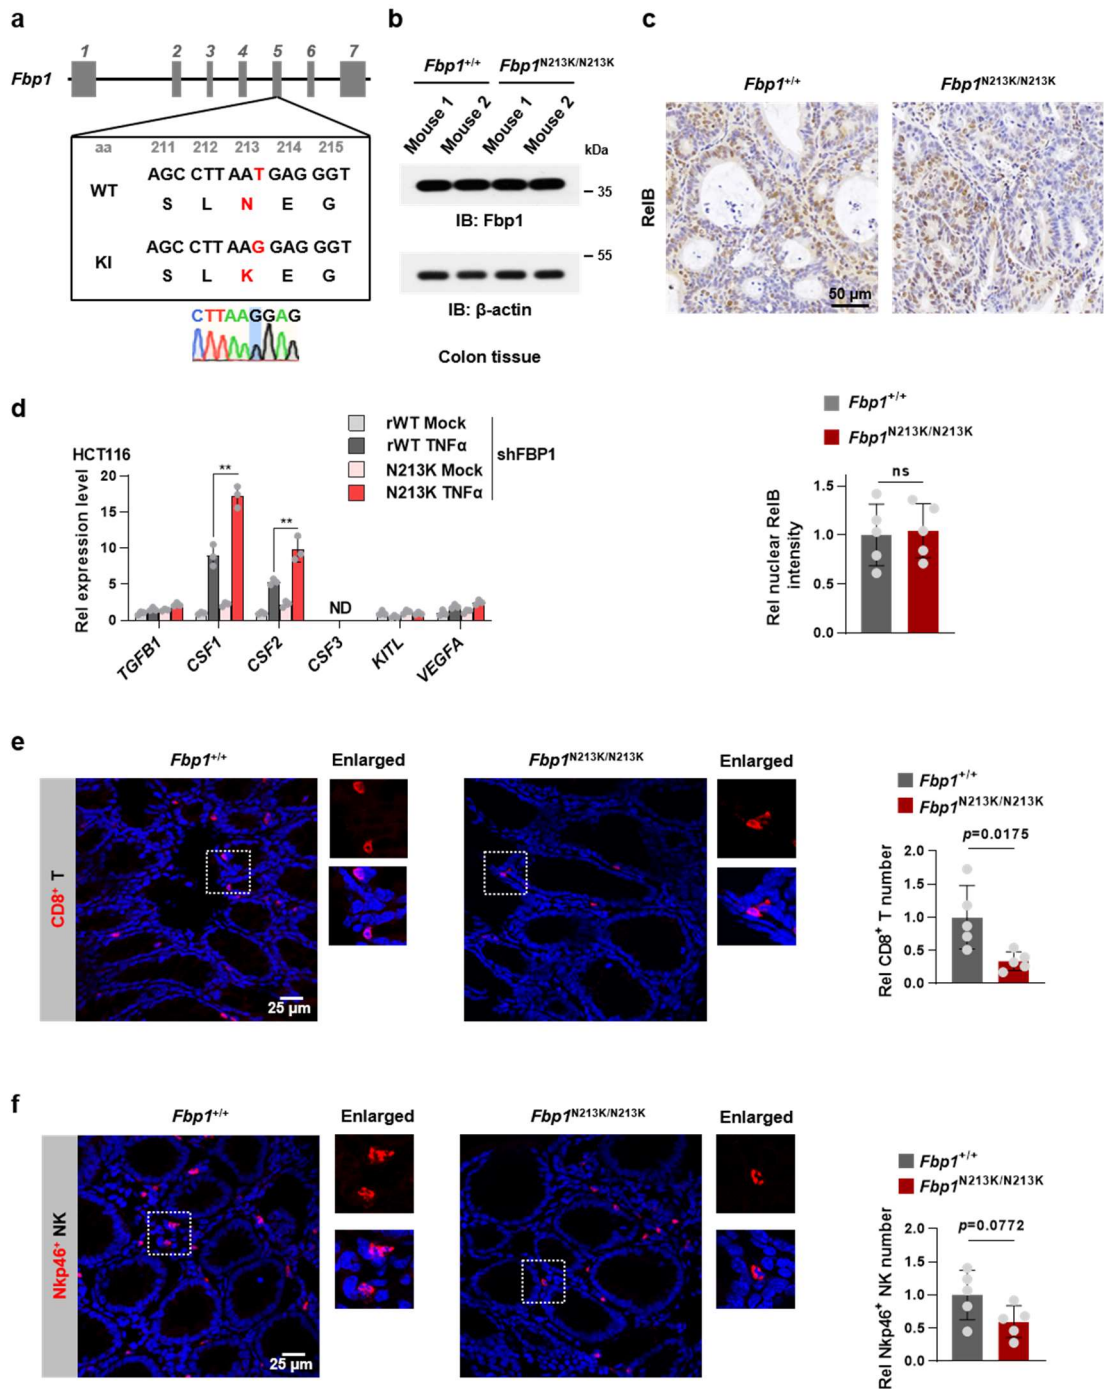

**Supplementary information, Fig. S4 FBP1-catalyzed I $\kappa$ B $\alpha$  dephosphorylation suppresses colorectal tumorigenesis by promoting inflammation-associated cell death and preventing MDSCs mobilization. Related to Fig. 4.**

**a** *Fbp1*<sup>N213K/N213K</sup> mice were generated.

**b** FBP1 expression was examined in colon tissues from *Fbp1*<sup>+/+</sup> and *Fbp1*<sup>N213K/N213K</sup> mice.

**c** Representative images of RelB staining in tumor sections from *Fbp1*<sup>+/+</sup> and *Fbp1*<sup>N213K/N213K</sup>

mice (n = 5) were shown (top panel). The statistical analysis of nuclear RelB levels was shown on the bottom panel.

**d** FBP1-depleted HCT116 cells were rescued with rFBP1 WT or N213K. Cells were treated with or without 10 ng/ml TNF $\alpha$  for 12 h. Cells were harvested and subjected to real-time qPCR. Data represent the mean  $\pm$ s.d. of the indicated values from three biologically independent experiments (two-tailed Student's t-test).

**e** IF staining with anti-CD8 antibody were performed in AOM/DSS-induced tumor sections from *Fbp1*<sup>+/+</sup> and *Fbp1*<sup>N213K/N213K</sup> mice. Representative images of CD8 staining were shown (left panel). The statistical analysis was shown on the right panel.

**f** IF staining with anti-Nkp46 antibody was performed in colon sections from *Fbp1*<sup>+/+</sup> and *Fbp1*<sup>N213K/N213K</sup> mice. Representative images of Nkp46 staining were shown (left panel). The statistical analysis was shown on the right panel. Each symbol represents an individual mouse.

**c, e, f** each symbol represents an individual mouse. Data represent the mean  $\pm$ s.d. of the indicated values obtained from five mice (two-tailed Student's t-test).
