# Supplementary material
Source: PubMed Central journal article supplement (PMC9977772)
Supplement: 41422_2022_773_MOESM5_ESM.pdf [file 41422_2022_773_MOESM5_ESM.pdf]

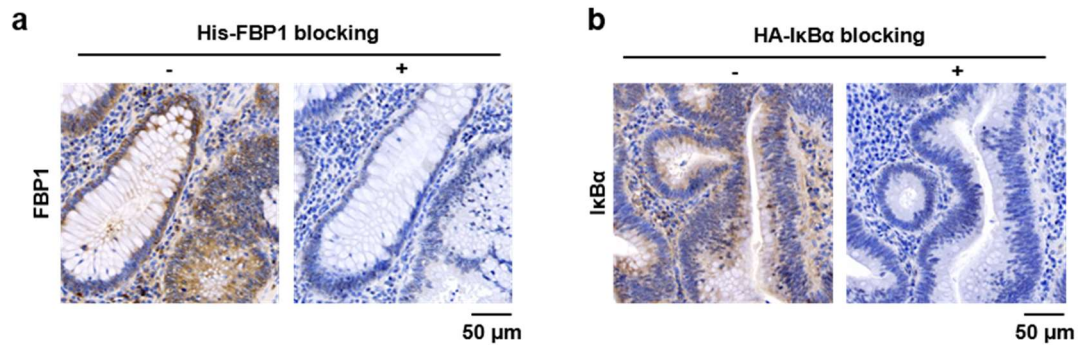

**Supplementary information, Fig. S5 Validation of antibody specificity. Related to Fig. 5.**

**a** IHC analyses of human CRC specimens were performed with anti-FBP1 antibody in the absence or presence of His-FBP1 blocking protein.

**b** IHC analyses of human CRC specimens were performed with anti-IκBα antibody in the absence or presence of HA-IκBα blocking protein.

**a, b** Data are representative of three biologically independent experiments.
